# Supplementary material
Source: publisher site journal article supplement (https://www.dovepress.com/article/529385)
Supplement: Supplementary file 1 [file Supplementary%20file.docx]

Supplementary information for

**Herb-drug interaction between Sailuotong and** **pitavastatin: a systematic pharmacokinetic investigation and mechanism analysis**

Ying Zhang#, Huan Yi#, Hongtian Yang, Yuchen Song, Changying Ren, Xiang Li, Ying Zhang*

Beijing Key Laboratory of Pharmacology of Chinese Materia Medica, Institute of Basic Medical Sciences, Xiyuan Hospital, China Academy of Chinese Medical Sciences, Beijing, 100091, China

*Correspondence author: Ying Zhang, Beijing Key Laboratory of Pharmacology of Chinese Materia Medica, Institute of Basic Medical Sciences, Xiyuan Hospital, China Academy of Chinese Medical Sciences, Beijing, 100091, China, Tel (010) 62835639, E-mail [zhyingde_xy@163.com](mailto:zhyingde_xy@163.com).

# These two authors contributed equally to this work.

1. **Materials and Methods**

The validation procedures for selectivity, linearity, accuracy, precision, recovery and stability referred to the U.S. Food and Drug Administration (FDA) guidelines for bioanalytical method validation.

**1.1 Quantitative analysis of pitavastatin in bio-samples**

The concentration of pitavastatin (PIV) in bio-samples was analyzed using an LC-MS/MS method. This analysis was performed using an API 4000 QTRAP LC-MS/MS system (Applied Biosystems, USA). Chromatographic separation was performed using an Agilent ZORBAX SB-C18 column (2.1 × 50 mm, 5 μm) (Agilent Technologies, USA). The mobile phases consisted of a mixture of water, methanol and acetonitrile (9:0.5:0.5, v/v, Phase A), and a mixture of acetonitrile and methanol (1:1, v/v, Phase B), both containing 0.05% formic acid. Linear gradient elution was applied at a flow rate of 0.35 mL/min, with the percentage of B increasing from 40% to 68% (0-0.3 min), then held at 68% (0.31-1.4 min), before decreasing back to 40% for equilibration (1.5-4.5 min). The autosampler was maintained at 4℃ and the injection volume was 4 μL. The electrospray ionization (ESI) source of the mass spectrometer was operated in the positive ion mode. Multiple reaction monitoring was performed for the transitions at 422.2→290.0 m/z for PIV and 559.3 → 440.2 m/z for the atorvastatin internal standard (IS). The corresponding declustering potential and the collision energy were set to 121 V and 39 eV for PIV, and 106 V and 31 eV for the IS, respectively. The optimized ion source parameters were as follows: curtain gas, 20 psi; nebulizer gas 1, 30 psi; auxiliary gas, 40 psi; ion spray voltage, 5500 V; and source temperature, 500℃.

**1****.1.1 Specificity**

The specificity of the established HPLC-MS/MS method was validated using blank sample from six different batches of rats. The blank samples from six rats were processed according to the “Sample preparation” section, with the exception of not adding the IS, and injected to obtain a blank chromatogram. A solution containing known concentrations of PIV and the IS was added to the blank sample and processed as per the “Sample preparation” section, and injected to obtain a chromatogram of simulated samples. Samples collected after dosing the rats were also processed according to the “Sample preparation” section and injected to obtain sample chromatograms. This procedure was employed to investigate whether endogenous substances in the blank sample interfere with the determination of the analytes of interest.

**1.1.2 Linearity and LLOQ**

A volume of 90.0 μL of blank samples was spiked with 10.0 μL of standard solution to prepare samples with PIV. The samples were processed according to the “Sample preparation” section, and 4.0 μL of each was injected for analysis to record the chromatograms. The concentration of the analyte served as the x-axis, and the peak area ratio of the analyte to the internal standard was plotted on the y-axis. A weighted (W=1/x2) least squares regression was used to construct the calibration curve, with the equation of the linear regression representing the standard curve. The lowest point on the standard curve was considered as the lower limit of quantification (LLOQ).

**1.1.3 Accuracy and Precision**

The LLOQ and three quality control (QC) concentration levels was selected to evaluate the precision and accuracy of the developed HPLC-MS/MS method. The procedure was conducted according to the “Sample preparation” section, with the measurements taken consecutively over three days. Concentrations for the LLOQ and QC samples were calculated based on the daily standard curve, and the results were used to determine the method’s accuracy and precision.

**1.1.4 Recovery and Matrix Effect**

Three QC samples were prepared according to the “Sample preparation” section to obtain peak area A. Additionally, blank samples were prepared according to the “Sample preparation” section (without internal standard), centrifuged, and the supernatant was collected to obtain blank matrix samples. Internal standard solution and standard solutions of different concentrations were added to prepare low-, medium-, and high-concentration matrix samples, which were analyzed to obtain peak area B. Similarly, pure solutions containing the same analyte and internal standard were prepared to obtain peak area C. The extraction recovery was calculated based on the ratio of peak areas A/B for each concentration, and the matrix effect was determined by the ratio of peak areas B/C.

**1.1.5 Stability**

QC samples of low, medium, and high concentrations of PIV were prepared, with four samples per concentration, to assess the stability of the samples under various conditions. The stability tests included freeze-thaw cycle stability (three cycles at −20.0 °C), room temperature stability (placed at room temperature for 4.0 hours), and autosampler stability (placed in an autosampler at 4.0 °C for 6.0 hours).

**1.2 Quantitative analysis of digoxin in plasma**

The concentration of digoxin in rat plasma was determined using the same LC-MS/MS instrumental system as for PIV. Chromatographic separation was performed using an Agilent ZORBAX XDB-C18 column (2.1 × 50 mm, 5 μm) (Agilent Technologies, USA). The mobile phases comprised a mixture of water and acetonitrile (9:1, v/v, Phase A) and acetonitrile (Phase B), both containing 0.01% formic acid. A linear gradient elution was applied at a flow rate of 0.4 mL/min, with B increased from 15% to 60% (0.1-0.5 min), held at 60% for 1.0 min, then decreased to 15% for equilibration from 2.1-6.0 min. The ESI source of the mass spectrometer was operated in negative ion mode. Multiple reaction monitoring was performed for the transitions at 779.4→649.2 m/z for digoxin and 796.3 → 633.2 m/z for IS. The corresponding declustering potential and the collision energy were set to -140 V and -46 eV for digoxin, and -115 V and -42 eV for IS, respectively. The optimized ion source parameters were as follows: curtain gas, 15 psi; nebulizer gas, 50 psi; auxiliary gas, 40 psi; ion spray voltage, -4000 V; and source temperature, 500℃.

The methodological validation methods for digoxin are the same as those for PIV.

**1.3 Quantitative analysis of betrixaban in plasma**

The concentration of betrixaban in rat plasma was determined using the same LC-MS/MS instrumental, analytical column, and mobile phases as for digoxin. A linear gradient elution was applied at a flow rate of 0.4 mL/min, with B increased from 15% to 60% (0.1-0.3 min), held at 60% for 0.2 min, then decreased to 15% for equilibration from 0.6-5.0 min. The ESI source of the mass spectrometer was operated in positive ion mode. Multiple reaction monitoring was performed for the transitions at 452.2→324.2 m/z for digoxin and 436.0→145.0 m/z for IS. The corresponding declustering potential and the collision energy were set to 116 V and 33 eV for betrixaban, and to 96 V and 39 eV for IS, respectively. The optimized ion source parameters were as follows: curtain gas, 15 psi; nebulizer gas, 50 psi; auxiliary gas, 50 psi; ion spray voltage, 5500 V; and source temperature, 600℃.

The methodological validation methods for betrixaban are the same as those for PIV.

1. **Results**

**2.1 Quantitative analysis of pitavastatin in bio-samples**

**2.1.1 Specificity**

The retention time for PIV was 1.26 min. No interference from PIV or IS was observed in the blank bio-sample of normal rats, indicating that the established method showed good specificity. Chromatograms are shown in Supplementary Figure 1.

**2.1.2 Linearity and LLOQ**

The linear ranges of PIV in plasma, liver, and bile were 1.56-200.00 ng/mL, 15.60-1000.00 ng/mL, and 4.88-30000.00 ng/mL, respectively, with good linearity (r ≥ 0.9900). The linear relationship was good, and the LLOQ of PIV in plasma, liver, and bile were 1.56, 15.60, and 4.88 ng/mL. The regression equations for PIV in bio-samples were shown in Supplementary Table 1.

**2.1.3 Accuracy and Precision**

The intra-day and inter-day precision (RSD) and accuracy (RE) for PIV were all less than 15.00%, meeting the requirements for methodological validation. This indicates that the established HPLC-MS/MS method possesses good precision and accuracy, ensuring the reliability of the drug measurement results *in vivo*.

**2.1.4 Recovery and Matrix Effect**

The extraction recovery rates for PIV were between 100.00-110.00% and RSD was less than 15.00%. These results indicate that high and stable recovery rates that meet the standards required for methodological validation. The matrix effect results showed that the matrix effect for PIV was 90.00-106.00%. These findings are in accordance with the standards for methodological validation, further indicating that the established HPLC-MS/MS method and drug extraction technique are appropriate. The endogenous substances did not produce significant matrix effects, thus not affecting the accuracy of the analyte measurements.

**2.1.5 Stability**

The simulated samples of PIV were found to be stable under conditions of freeze-thaw cycles, room temperature storage, and auto-sampler storage, with all RE being less than 15.00%. These results meet the necessary requirements for stability.

**2.2** **Quantitative analysis of** **digoxin in plasma**

The retention time for digoxin was 2.83 min. The specificity assay results demonstrated that endogenous substances in blank sample did not interfere with the determination of digoxin and IS. Chromatograms were shown in Supplementary Figure 2. The linear range for digoxin was 0.10-100.00 ng/mL. The regression equation for digoxin was y=0.0488x+0.0022 (r = 0.9999). The linear relationship was good, and the LLOQ was 0.10 ng/mL. The intra-day and inter-day precision had RSD and RE for digoxin was all less than 13.17%. The extraction recovery rates and matrix effects were consistent across different concentrations, with inter-individual variation less than 15.00%. Stability all showed RSD was less than 11.20%. These results meet the necessary requirements for quantitative analysis.

**2.3 Quantitative analysis of betrixaban in plasma**

The retention time for betrixaban was 2.69 min. The specificity assay results demonstrated that endogenous substances in blank sample did not interfere with the determination of betrixaban and IS. Chromatograms are shown in Supplementary Figure 3. The linear ranges for betrixaban were 0.16-100.00 ng/mL. The regression equation for betrixaban was y=0.117x+0.0101(r = 0.9960). The linear relationship was good, and the LLOQ was 0.16 ng/mL. The intra-day and inter-day precision had RSD and RE for betrixaban were all less than 11.30%. The extraction recovery rates and matrix effects were consistent across different concentrations, with inter-individual variation being less than 15.00%. Stability all showed RSD was less than 15.00%. These results meet the necessary requirements for quantitative analysis.


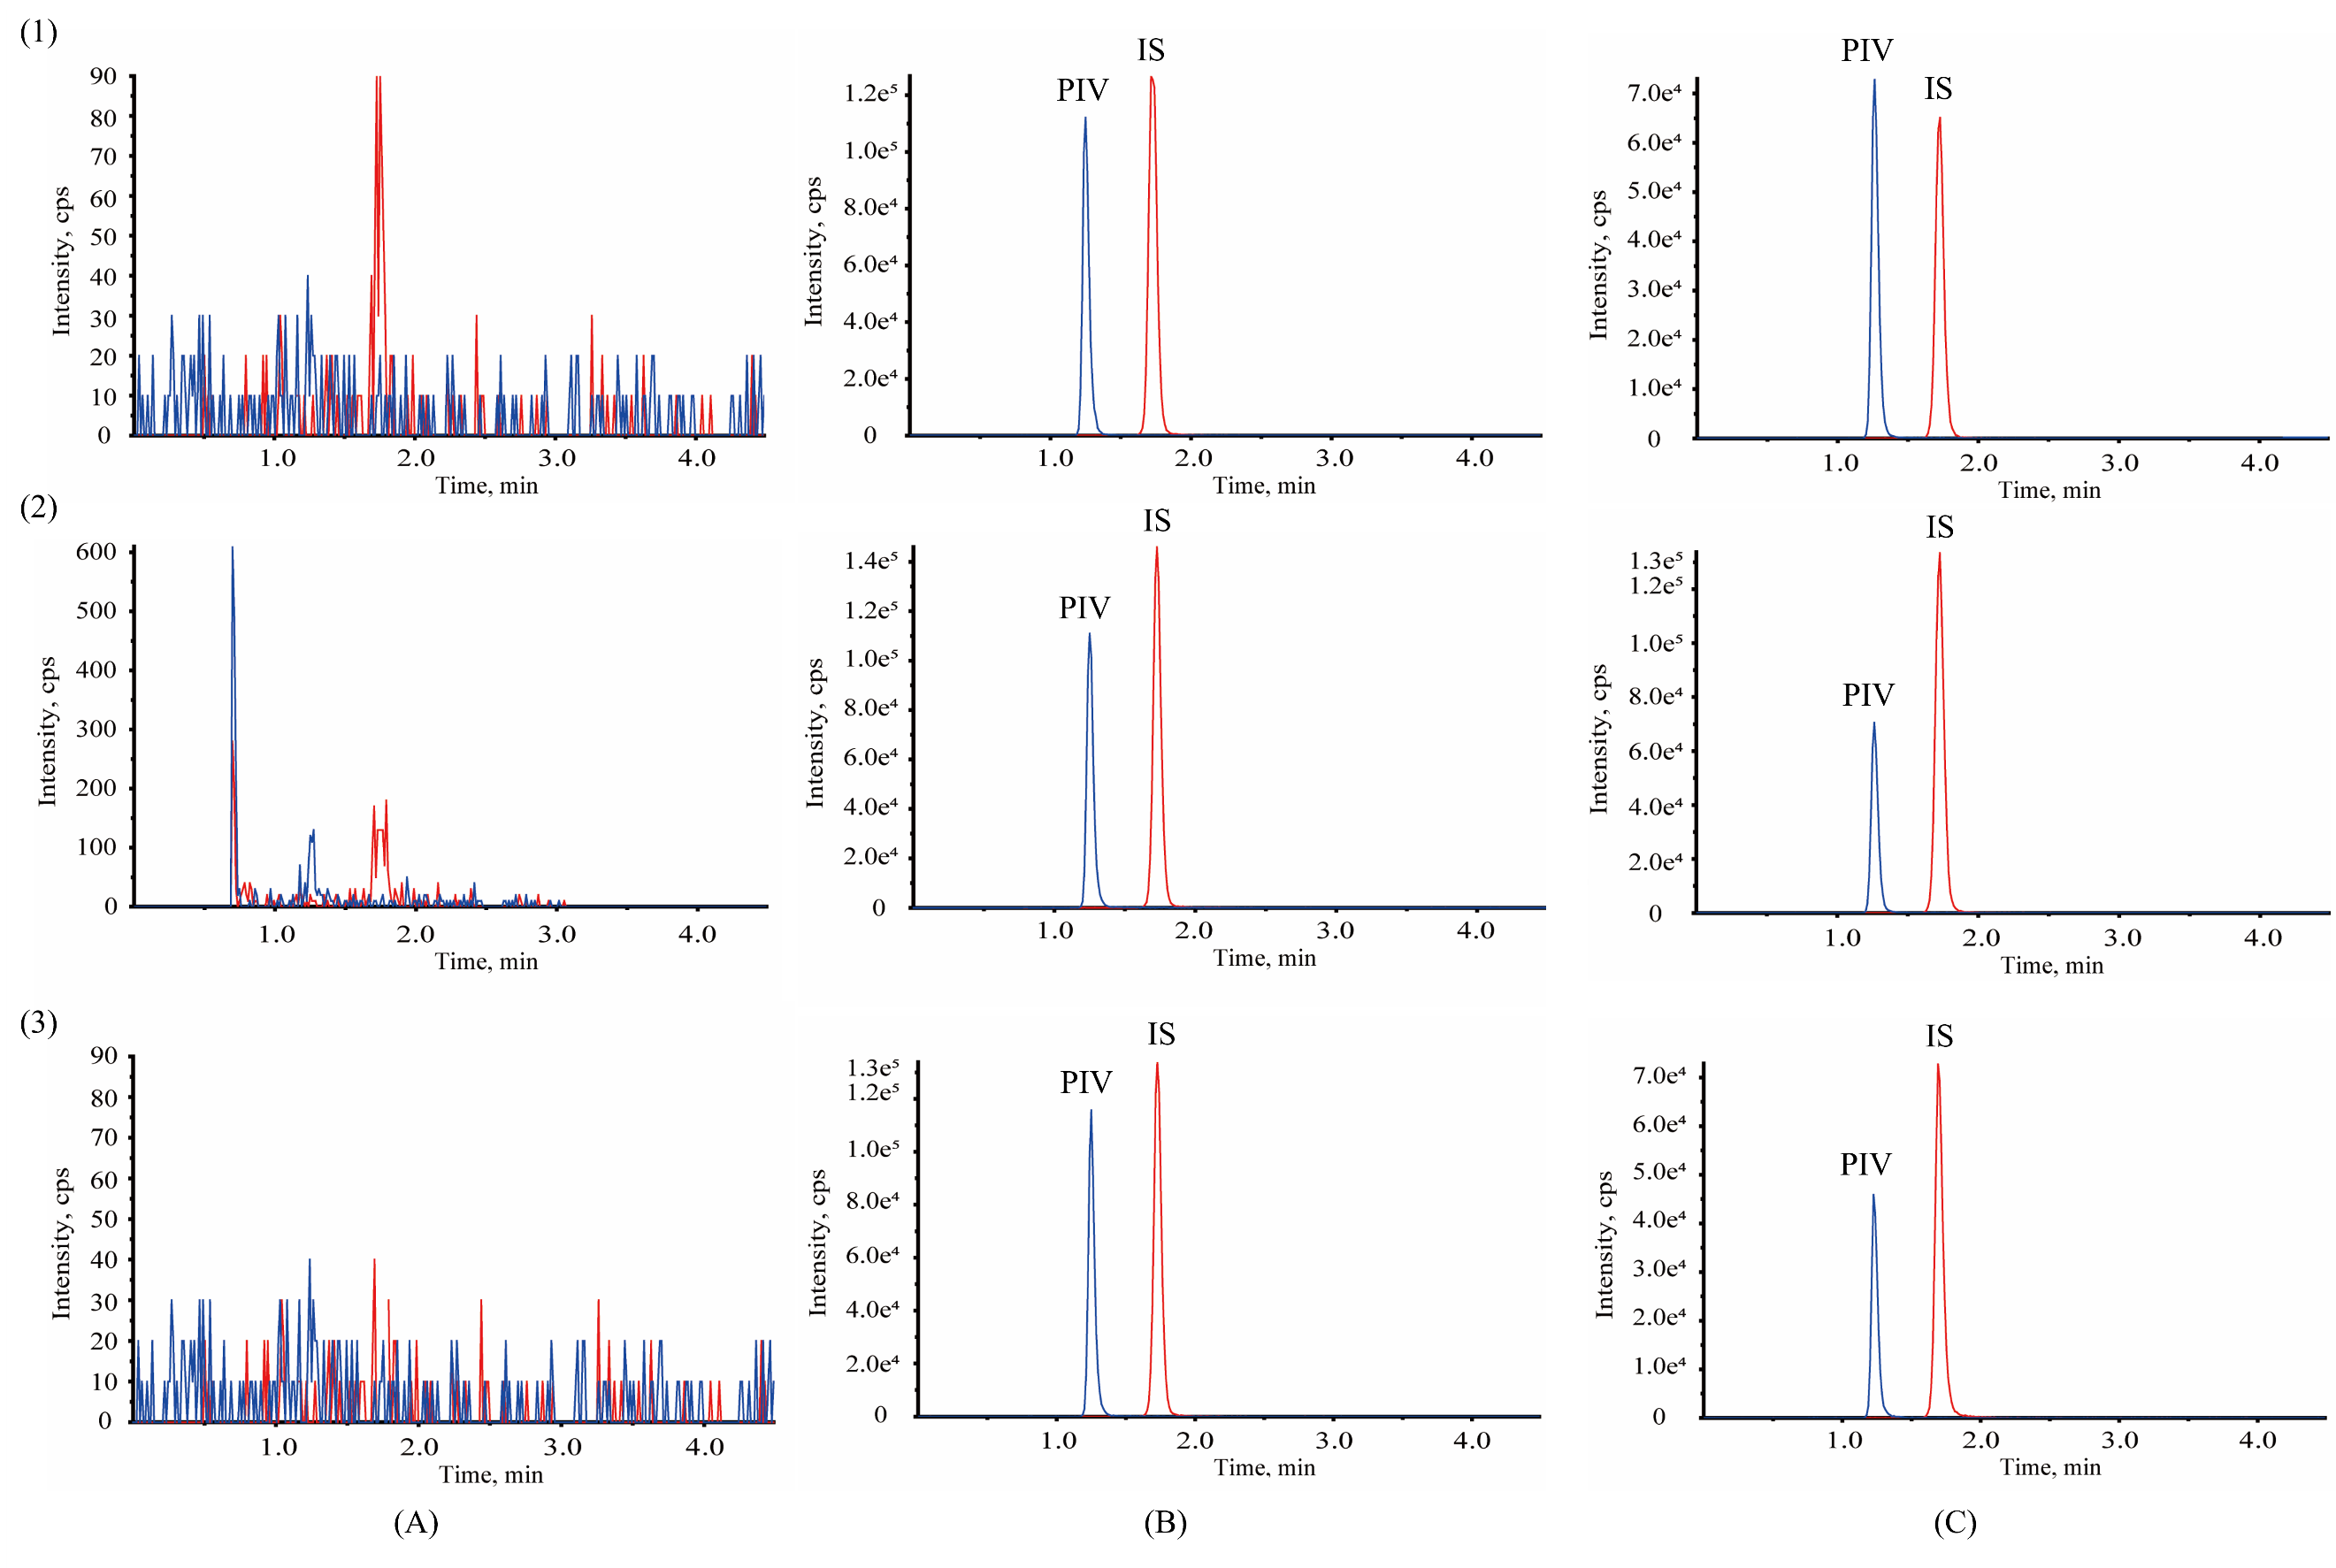


Supplementary Figure 1 Representative HPLC-MS/MS chromatograms of PIV: (1) in plasma; (2) in liver; (3) in bile; (A) a blank sample; (B) a blank sample spiked with analytes and IS; and (C) sample of a rat post-dosing.


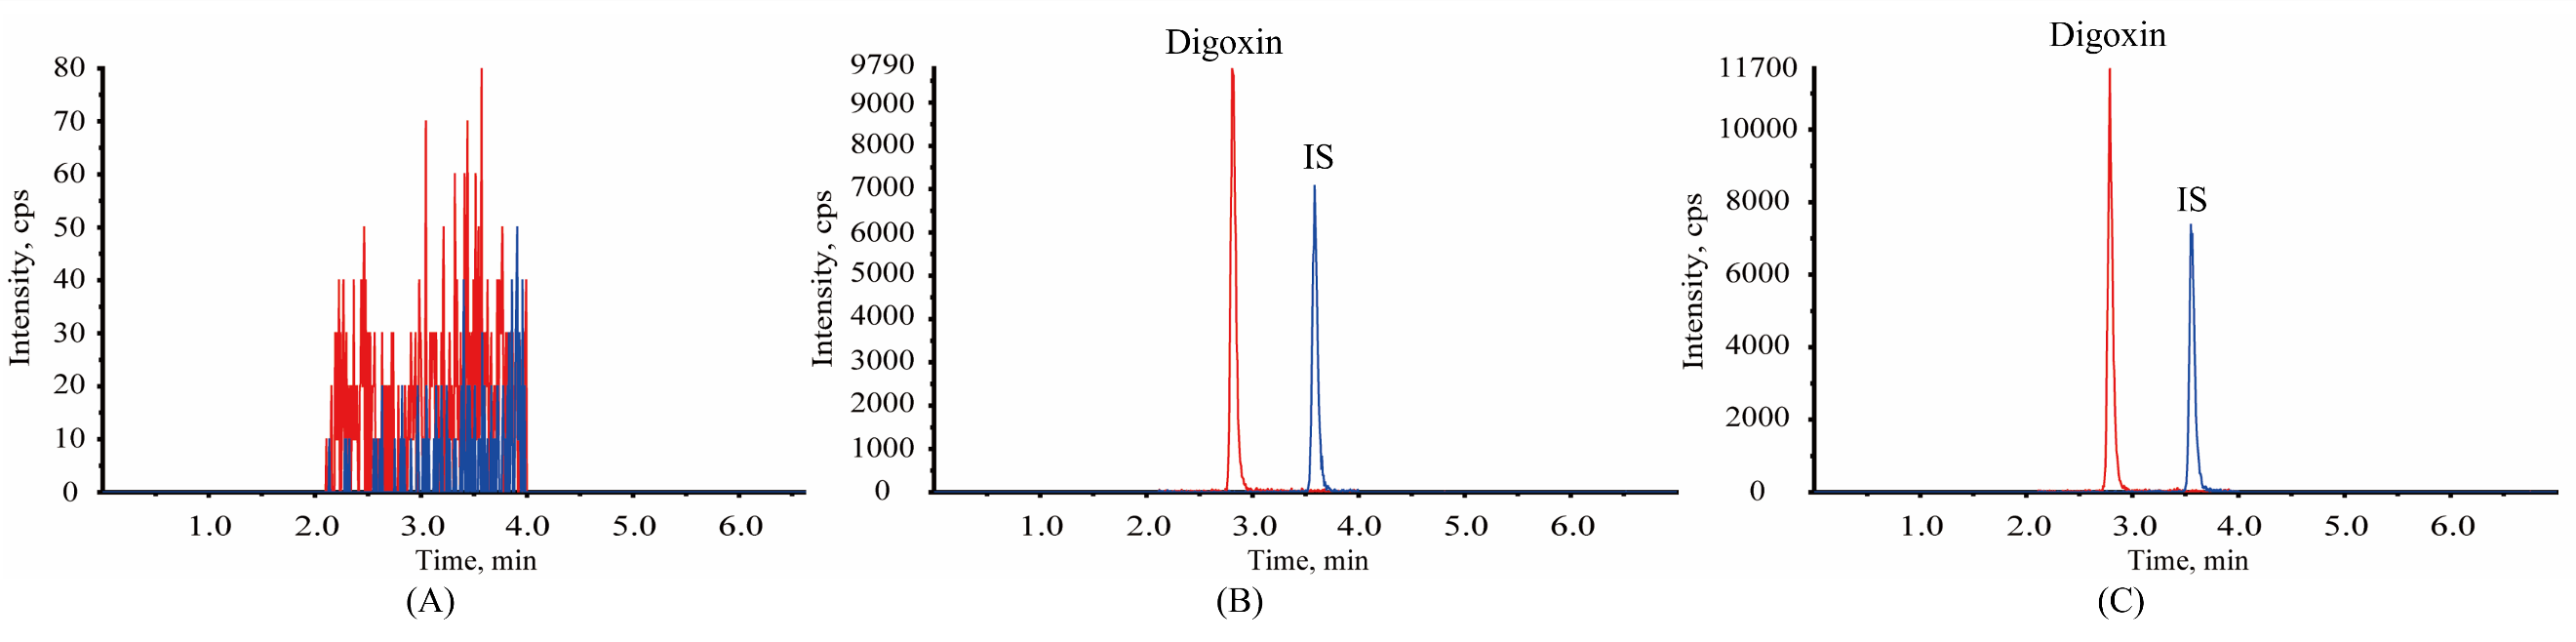


Supplementary Figure 2 Representative HPLC-MS/MS chromatograms for digoxin: (A) a blank sample; (B) a blank sample spiked with analytes and IS; and (C) sample of a rat post-dosing.


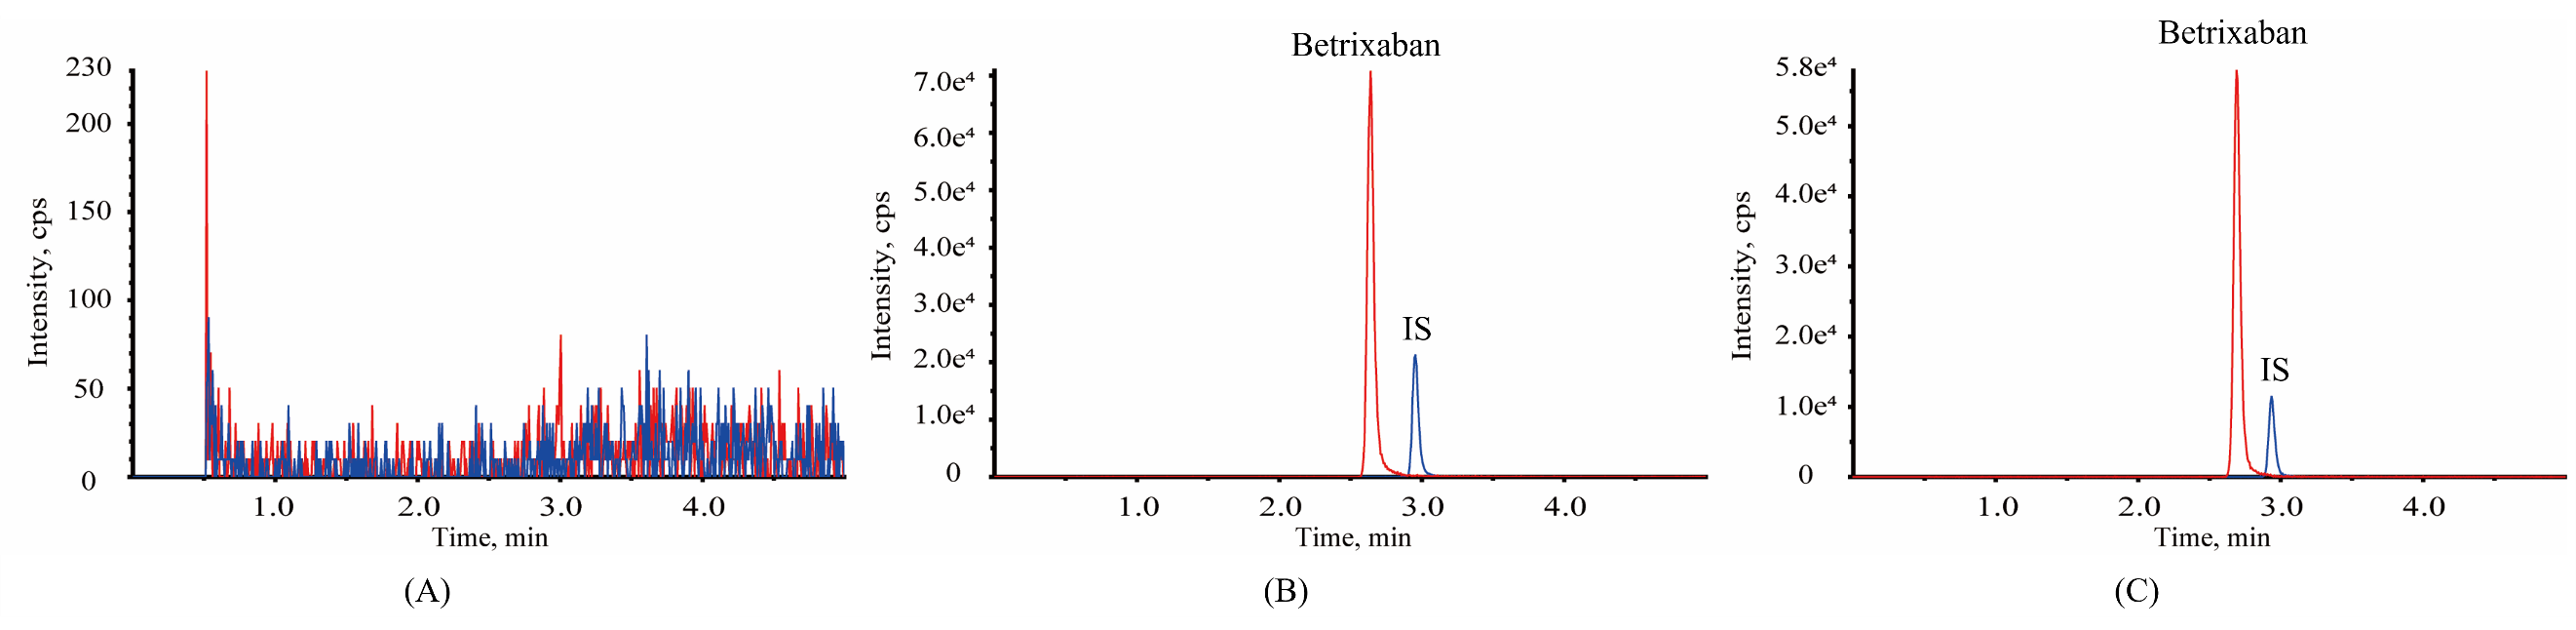


Supplementary Figure 3 Representative HPLC-MS/MS chromatograms betrixaban: (A) a blank sample; (B) a blank sample spiked with analytes and IS; and (C) sample of a rat post-dosing.

Supplementary Table 1 Standard curve and LLOQ for PIV in bio-samples

|  | Linear regression | r | Linear range (ng/mL) | LLOQ (ng/mL) |
| --- | --- | --- | --- | --- |
| Plasma | y=0.00482x+0.000817 | 0.9940 | 1.56-200.00 | 1.56 |
| Liver | y=0.00604x+0.0513 | 0.9942 | 15.60-1000.00 | 15.60 |
| Bile | y=0.00249x+0.0115 | 0.9902 | 4.88-30000.00 | 4.88 |
